# Supplementary material for: Discovering Genetic Factors for psoriasis through exhaustively searching for significant second order SNP-SNP interactions
Source: PubMed Central journal article supplement (PMC6185942; doi:10.1038/s41598-018-33493-w), 2018-10-12
Supplement: 41598_2018_33493_MOESM1_ESM.pdf [file 41598_2018_33493_MOESM1_ESM.pdf]

## Supplementary Materials

Title: Discovering Genetic Factors for psoriasis through exhaustively searching for significant second order SNP-SNP interactions

Authors: Kwan-Yeung Lee, Kwong-Sak Leung, Nelson L.S. Tang and Man-Hon Wong

|                                                   | phs000019.v1.p1    | phs000982.v1.p1 |
|---------------------------------------------------|--------------------|-----------------|
| Missing rate                                      | >0.01              | >0.05           |
| Minor allele frequency (MAF)                      | <0.01              |                 |
| Hardy-Weinberg equilibrium (HWE)                  | $p$ -value<0.00001 |                 |
| Missing rate deviation between cases and controls | $p$ -value<0.00001 |                 |

**Supplementary Table S1:** This table shows the data cleansing parameters for filtering low-quality SNPs. SNPs satisfying any one of the following conditions listed in this table are filtered.

|                     | phs000019.v1.p1                                                              | phs000982.v1.p1    |
|---------------------|------------------------------------------------------------------------------|--------------------|
| Missing rate        | >0.05                                                                        | >0.005             |
| Gender              | Inconsistency between reported gender and gender predicted with X chromosome |                    |
| Heterozygosity rate | -                                                                            | <0.2775 or >0.2875 |

**Supplementary Table S2:** This table shows the data cleansing parameters for filtering low-quality samples. Samples satisfying any one of the following conditions listed in this table are filtered.

| SNP1       | SNP2       | Pattern | SNP1<br><i>p</i> -value | SNP2<br><i>p</i> -value | 2 <sup>nd</sup> Order<br><i>p</i> -value | Improvement<br>Metric Value | Odds<br>Ratio | 2 <sup>nd</sup> Order<br><i>p</i> -value<br>(phs000982) |
|------------|------------|---------|-------------------------|-------------------------|------------------------------------------|-----------------------------|---------------|---------------------------------------------------------|
| rs12191877 | rs2534666  | 4       | $6.89 \times 10^{-23}$  | $2.08 \times 10^{-6}$   | $6.93 \times 10^{-30}$                   | $9.95 \times 10^6$          | 3.9339        | $1.28 \times 10^{-14}$                                  |
| rs3130573  | rs12191877 | 4       | $6.76 \times 10^{-8}$   | $6.89 \times 10^{-23}$  | $6.98 \times 10^{-29}$                   | $9.87 \times 10^5$          | 3.7570        | $8.04 \times 10^{-17}$                                  |
| rs9262492  | rs12191877 | 4       | $4.39 \times 10^{-6}$   | $6.89 \times 10^{-23}$  | $3.28 \times 10^{-28}$                   | $2.10 \times 10^5$          | 3.5653        | $2.75 \times 10^{-26}$                                  |
| rs2894176  | rs12191877 | 4       | $1.93 \times 10^{-6}$   | $6.89 \times 10^{-23}$  | $3.64 \times 10^{-28}$                   | $1.89 \times 10^5$          | 3.5434        | $1.40 \times 10^{-25}$                                  |
| rs3130517  | rs12191877 | 4       | $3.57 \times 10^{-17}$  | $6.89 \times 10^{-23}$  | $4.45 \times 10^{-28}$                   | $1.55 \times 10^5$          | 3.5369        | $1.51 \times 10^{-18}$                                  |
| rs9262498  | rs12191877 | 4       | $3.90 \times 10^{-6}$   | $6.89 \times 10^{-23}$  | $5.01 \times 10^{-28}$                   | $1.38 \times 10^5$          | 3.5473        | $3.65 \times 10^{-26}$                                  |
| rs1265078  | rs12191877 | 4       | $2.40 \times 10^{-11}$  | $6.89 \times 10^{-23}$  | $6.80 \times 10^{-28}$                   | $1.01 \times 10^5$          | 3.5547        | $1.81 \times 10^{-18}$                                  |
| rs12191877 | rs2516417  | 3       | $6.89 \times 10^{-23}$  | $6.72 \times 10^{-4}$   | $8.30 \times 10^{-28}$                   | $8.31 \times 10^4$          | 3.3355        | $1.34 \times 10^{-20}$                                  |
| rs12191877 | rs2844502  | 3       | $6.89 \times 10^{-23}$  | $9.32 \times 10^{-3}$   | $1.35 \times 10^{-27}$                   | $5.12 \times 10^4$          | 3.3261        | $8.76 \times 10^{-20}$                                  |
| rs3130467  | rs12191877 | 4       | $2.81 \times 10^{-16}$  | $6.89 \times 10^{-23}$  | $1.57 \times 10^{-27}$                   | $4.40 \times 10^4$          | 3.4868        | $1.66 \times 10^{-18}$                                  |
| rs12191877 | rs2516510  | 3       | $6.89 \times 10^{-23}$  | $1.04 \times 10^{-2}$   | $1.90 \times 10^{-27}$                   | $3.62 \times 10^4$          | 3.3109        | $1.54 \times 10^{-20}$                                  |
| rs3130517  | rs2894207  | 4       | $3.57 \times 10^{-17}$  | $1.28 \times 10^{-15}$  | $2.14 \times 10^{-27}$                   | $1.67 \times 10^{10}$       | 3.4250        | $5.65 \times 10^{-18}$                                  |
| rs3094205  | rs12191877 | 4       | $2.29 \times 10^{-9}$   | $6.89 \times 10^{-23}$  | $3.97 \times 10^{-27}$                   | $1.74 \times 10^4$          | 3.4440        | $6.78 \times 10^{-16}$                                  |
| rs2244027  | rs12191877 | 2       | $4.46 \times 10^{-2}$   | $6.89 \times 10^{-23}$  | $4.28 \times 10^{-27}$                   | $1.61 \times 10^4$          | 3.2691        | $3.23 \times 10^{-20}$                                  |
| rs12191877 | rs10848821 | 3       | $6.89 \times 10^{-23}$  | $2.27 \times 10^{-2}$   | $6.76 \times 10^{-27}$                   | $1.02 \times 10^4$          | 3.3101        | $3.26 \times 10^{-20}$                                  |
| rs3130467  | rs2894207  | 4       | $2.81 \times 10^{-16}$  | $1.28 \times 10^{-15}$  | $7.28 \times 10^{-27}$                   | $3.86 \times 10^{10}$       | 3.3781        | $6.15 \times 10^{-18}$                                  |
| rs12191877 | rs2523708  | 3       | $6.89 \times 10^{-23}$  | $1.60 \times 10^{-2}$   | $8.76 \times 10^{-27}$                   | $7.87 \times 10^3$          | 3.2564        | $2.13 \times 10^{-20}$                                  |
| rs12191877 | rs10483336 | 3       | $6.89 \times 10^{-23}$  | $2.40 \times 10^{-4}$   | $9.21 \times 10^{-27}$                   | $7.49 \times 10^3$          | 3.2045        | $9.55 \times 10^{-23}$                                  |
| rs12191877 | rs6075938  | 3       | $6.89 \times 10^{-23}$  | $7.79 \times 10^{-3}$   | $1.15 \times 10^{-26}$                   | $5.98 \times 10^3$          | 3.2515        | $1.58 \times 10^{-20}$                                  |
| rs1265078  | rs2894207  | 4       | $2.40 \times 10^{-11}$  | $1.28 \times 10^{-15}$  | $1.43 \times 10^{-26}$                   | $8.94 \times 10^{10}$       | 3.3389        | $6.79 \times 10^{-18}$                                  |

**Supplementary Table S3:** This table shows the top 20 statistically significant 2<sup>nd</sup> order SNP-SNP interactions in terms of *p*-value from psoriasis dataset phs000019.v1.p1.

| SNP1           | SNP2       | Pattern | SNP1<br><i>p</i> -value | SNP2<br><i>p</i> -value | 2 <sup>nd</sup> Order<br><i>p</i> -value | Improvement<br>Metric Value | Odds<br>Ratio | 2 <sup>nd</sup> Order<br><i>p</i> -value<br>(phs000019) |
|----------------|------------|---------|-------------------------|-------------------------|------------------------------------------|-----------------------------|---------------|---------------------------------------------------------|
| rs13203895     | rs4349859  | 5       | $6.79 \times 10^{-26}$  | $7.20 \times 10^{-9}$   | $1.18 \times 10^{-34}$                   | $5.77 \times 10^8$          | 2.6638        | $3.14 \times 10^{-21}$                                  |
| rs13191519     | rs4349859  | 5       | $4.07 \times 10^{-26}$  | $7.20 \times 10^{-9}$   | $1.26 \times 10^{-34}$                   | $3.23 \times 10^8$          | 2.6829        | $8.25 \times 10^{-21}$                                  |
| rs13203895     | rs4418214  | 5       | $6.79 \times 10^{-26}$  | $2.02 \times 10^{-19}$  | $1.67 \times 10^{-34}$                   | $4.06 \times 10^8$          | 2.6480        | $1.79 \times 10^{-19}$                                  |
| rs13191519     | rs4418214  | 5       | $4.07 \times 10^{-26}$  | $2.02 \times 10^{-19}$  | $1.86 \times 10^{-34}$                   | $2.18 \times 10^8$          | 2.6651        | $6.38 \times 10^{-19}$                                  |
| rs10484554     | rs4349859  | 5       | $9.96 \times 10^{-26}$  | $7.20 \times 10^{-9}$   | $4.17 \times 10^{-34}$                   | $2.39 \times 10^8$          | 2.6451        | $7.11 \times 10^{-21}$                                  |
| rs10484554     | rs4418214  | 5       | $9.96 \times 10^{-26}$  | $2.02 \times 10^{-19}$  | $5.89 \times 10^{-34}$                   | $1.69 \times 10^8$          | 2.6294        | $5.56 \times 10^{-19}$                                  |
| rs13203895     | rs45533135 | 5       | $6.79 \times 10^{-26}$  | $1.20 \times 10^{-8}$   | $7.72 \times 10^{-34}$                   | $8.80 \times 10^7$          | 2.6206        | $8.50 \times 10^{-20}$                                  |
| rs13191519     | rs45533135 | 5       | $4.07 \times 10^{-26}$  | $1.20 \times 10^{-8}$   | $8.72 \times 10^{-34}$                   | $4.67 \times 10^7$          | 2.6371        | $1.76 \times 10^{-19}$                                  |
| rs75851973     | rs13203895 | 5       | $8.19 \times 10^{-10}$  | $6.79 \times 10^{-26}$  | $2.05 \times 10^{-33}$                   | $3.31 \times 10^7$          | 2.6087        | $1.13 \times 10^{-21}$                                  |
| rs76956521     | rs13203895 | 5       | $8.19 \times 10^{-10}$  | $6.79 \times 10^{-26}$  | $2.05 \times 10^{-33}$                   | $3.31 \times 10^7$          | 2.6087        | $1.13 \times 10^{-21}$                                  |
| rs17728338     | rs13203895 | 5       | $1.59 \times 10^{-9}$   | $6.79 \times 10^{-26}$  | $2.14 \times 10^{-33}$                   | $3.17 \times 10^7$          | 2.6073        | $6.55 \times 10^{-22}$                                  |
| rs75851973     | rs13191519 | 5       | $8.19 \times 10^{-10}$  | $4.07 \times 10^{-26}$  | $2.26 \times 10^{-33}$                   | $1.80 \times 10^7$          | 2.6260        | $1.85 \times 10^{-20}$                                  |
| rs76956521     | rs13191519 | 5       | $8.19 \times 10^{-10}$  | $4.07 \times 10^{-26}$  | $2.26 \times 10^{-33}$                   | $1.80 \times 10^7$          | 2.6260        | $1.85 \times 10^{-20}$                                  |
| rs17728338     | rs13191519 | 5       | $1.59 \times 10^{-9}$   | $4.07 \times 10^{-26}$  | $2.37 \times 10^{-33}$                   | $1.72 \times 10^7$          | 2.6244        | $1.07 \times 10^{-20}$                                  |
| snp5-150450166 | rs13203895 | 5       | $1.25 \times 10^{-9}$   | $6.79 \times 10^{-26}$  | $2.47 \times 10^{-33}$                   | $2.75 \times 10^7$          | 2.6058        | —                                                       |
| rs10484554     | rs45533135 | 5       | $9.96 \times 10^{-26}$  | $1.20 \times 10^{-8}$   | $2.69 \times 10^{-33}$                   | $3.70 \times 10^7$          | 2.6021        | $1.53 \times 10^{-19}$                                  |
| snp5-150450166 | rs13191519 | 5       | $1.25 \times 10^{-9}$   | $4.07 \times 10^{-26}$  | $2.72 \times 10^{-33}$                   | $1.50 \times 10^7$          | 2.6231        | —                                                       |
| rs75851973     | rs10484554 | 5       | $8.19 \times 10^{-10}$  | $9.96 \times 10^{-26}$  | $4.74 \times 10^{-33}$                   | $2.10 \times 10^7$          | 2.5966        | $9.32 \times 10^{-21}$                                  |
| rs76956521     | rs10484554 | 5       | $8.19 \times 10^{-10}$  | $9.96 \times 10^{-26}$  | $4.74 \times 10^{-33}$                   | $2.10 \times 10^7$          | 2.5966        | $9.32 \times 10^{-21}$                                  |
| rs17728338     | rs10484554 | 5       | $1.59 \times 10^{-9}$   | $9.96 \times 10^{-26}$  | $4.95 \times 10^{-33}$                   | $2.01 \times 10^7$          | 2.5952        | $5.40 \times 10^{-21}$                                  |

**Supplementary Table S4:** This table shows the top 20 statistically significant 2<sup>nd</sup> order SNP-SNP interactions in terms of *p*-value from psoriasis dataset phs000982.v1.p1.

| SNP1      | SNP2      | Pattern | SNP1<br><i>p</i> -value | SNP2<br><i>p</i> -value | 2 <sup>nd</sup> Order<br><i>p</i> -value | Improvement<br>Metric Value | Odds<br>Ratio | 2 <sup>nd</sup> Order<br><i>p</i> -value<br>(phs000982) |
|-----------|-----------|---------|-------------------------|-------------------------|------------------------------------------|-----------------------------|---------------|---------------------------------------------------------|
| rs1265078 | rs7773175 | 4       | $2.40 \times 10^{-11}$  | $3.04 \times 10^{-13}$  | $4.69 \times 10^{-25}$                   | $6.48 \times 10^{11}$       | 3.0436        | $6.50 \times 10^{-16}$                                  |
| rs1265078 | rs2894207 | 4       | $2.40 \times 10^{-11}$  | $1.28 \times 10^{-15}$  | $1.43 \times 10^{-26}$                   | $8.94 \times 10^{10}$       | 3.3389        | $6.79 \times 10^{-18}$                                  |
| rs3130573 | rs7773175 | 4       | $6.76 \times 10^{-8}$   | $3.04 \times 10^{-13}$  | $5.68 \times 10^{-24}$                   | $5.35 \times 10^{10}$       | 3.0176        | $1.79 \times 10^{-13}$                                  |
| rs9380237 | rs2534666 | 4       | $5.59 \times 10^{-10}$  | $2.08 \times 10^{-6}$   | $1.11 \times 10^{-20}$                   | $5.02 \times 10^{10}$       | 2.7506        | $1.12 \times 10^{-9}$                                   |
| rs3130467 | rs2894207 | 4       | $2.81 \times 10^{-16}$  | $1.28 \times 10^{-15}$  | $7.28 \times 10^{-27}$                   | $3.86 \times 10^{10}$       | 3.3781        | $6.15 \times 10^{-18}$                                  |
| rs7756521 | rs1265078 | 4       | $4.65 \times 10^{-9}$   | $2.40 \times 10^{-11}$  | $7.98 \times 10^{-22}$                   | $3.00 \times 10^{10}$       | 3.1234        | $1.22 \times 10^{-11}$                                  |
| rs1265078 | rs9380237 | 4       | $2.40 \times 10^{-11}$  | $5.59 \times 10^{-10}$  | $9.45 \times 10^{-22}$                   | $2.53 \times 10^{10}$       | 2.8208        | $2.75 \times 10^{-18}$                                  |
| rs3130517 | rs2894207 | 4       | $3.57 \times 10^{-17}$  | $1.28 \times 10^{-15}$  | $2.14 \times 10^{-27}$                   | $1.67 \times 10^{10}$       | 3.4250        | $5.65 \times 10^{-18}$                                  |
| rs2894207 | rs2534666 | 4       | $1.28 \times 10^{-15}$  | $2.08 \times 10^{-6}$   | $1.09 \times 10^{-25}$                   | $1.17 \times 10^{10}$       | 3.3436        | $4.22 \times 10^{-12}$                                  |
| rs3130517 | rs7773175 | 4       | $3.57 \times 10^{-17}$  | $3.04 \times 10^{-13}$  | $1.45 \times 10^{-26}$                   | $2.46 \times 10^9$          | 3.1788        | $2.10 \times 10^{-15}$                                  |
| rs2853950 | rs3130573 | 4       | $3.93 \times 10^{-6}$   | $6.76 \times 10^{-8}$   | $2.93 \times 10^{-17}$                   | $2.30 \times 10^9$          | 2.4168        | $4.15 \times 10^{-8}$                                   |
| rs3094205 | rs1265078 | 4       | $2.29 \times 10^{-9}$   | $2.40 \times 10^{-11}$  | $1.37 \times 10^{-20}$                   | $1.75 \times 10^9$          | 2.6799        | $6.27 \times 10^{-13}$                                  |
| rs7756521 | rs8365    | 4       | $4.65 \times 10^{-9}$   | $1.29 \times 10^{-8}$   | $3.36 \times 10^{-18}$                   | $1.38 \times 10^9$          | 3.3442        | $3.03 \times 10^{-6}$                                   |
| rs3130467 | rs7773175 | 4       | $2.81 \times 10^{-16}$  | $3.04 \times 10^{-13}$  | $2.08 \times 10^{-25}$                   | $1.35 \times 10^9$          | 3.0823        | $3.11 \times 10^{-15}$                                  |
| rs2894176 | rs3130467 | 4       | $1.93 \times 10^{-6}$   | $2.81 \times 10^{-16}$  | $2.61 \times 10^{-25}$                   | $1.08 \times 10^9$          | 3.0994        | $4.16 \times 10^{-13}$                                  |
| rs7756521 | rs3130573 | 4       | $4.65 \times 10^{-9}$   | $6.76 \times 10^{-8}$   | $5.13 \times 10^{-18}$                   | $9.07 \times 10^8$          | 2.7101        | $1.04 \times 10^{-8}$                                   |
| rs2894176 | rs3130517 | 4       | $1.93 \times 10^{-6}$   | $3.57 \times 10^{-17}$  | $5.38 \times 10^{-26}$                   | $6.64 \times 10^8$          | 3.1598        | $2.12 \times 10^{-13}$                                  |
| rs9262498 | rs1265078 | 4       | $3.90 \times 10^{-6}$   | $2.40 \times 10^{-11}$  | $3.71 \times 10^{-20}$                   | $6.46 \times 10^8$          | 2.6695        | $4.27 \times 10^{-11}$                                  |
| rs2844645 | rs3094205 | 2       | $2.56 \times 10^{-9}$   | $2.29 \times 10^{-9}$   | $3.72 \times 10^{-18}$                   | $6.14 \times 10^8$          | 2.4554        | $1.42 \times 10^{-7}$                                   |
| rs3130573 | rs2894207 | 4       | $6.76 \times 10^{-8}$   | $1.28 \times 10^{-15}$  | $2.26 \times 10^{-24}$                   | $5.66 \times 10^8$          | 3.1827        | $1.81 \times 10^{-15}$                                  |

**Supplementary Table S5:** This table shows the top 20 statistically significant 2<sup>nd</sup> order SNP-SNP interactions in terms of improvement metric value from psoriasis dataset phs000019.v1.p1.

| SNP1      | SNP2       | Pattern | SNP1<br><i>p</i> -value | SNP2<br><i>p</i> -value | 2 <sup>nd</sup> Order<br><i>p</i> -value | Improvement<br>Metric Value | Odds<br>Ratio | 2 <sup>nd</sup> Order<br><i>p</i> -value<br>(phs000019) |
|-----------|------------|---------|-------------------------|-------------------------|------------------------------------------|-----------------------------|---------------|---------------------------------------------------------|
| rs2517985 | rs4358666  | 5       | $5.02 \times 10^{-8}$   | $2.62 \times 10^{-9}$   | $1.07 \times 10^{-21}$                   | $2.45 \times 10^{12}$       | 2.3225        | $6.84 \times 10^{-11}$                                  |
| rs2517985 | rs34100370 | 5       | $5.02 \times 10^{-8}$   | $2.62 \times 10^{-9}$   | $1.07 \times 10^{-21}$                   | $2.45 \times 10^{12}$       | 2.3225        | $4.55 \times 10^{-11}$                                  |
| rs2517985 | rs2395491  | 5       | $5.02 \times 10^{-8}$   | $5.01 \times 10^{-8}$   | $3.46 \times 10^{-20}$                   | $1.45 \times 10^{12}$       | 2.2707        | $3.04 \times 10^{-9}$                                   |
| rs2517985 | rs4624908  | 5       | $5.02 \times 10^{-8}$   | $7.03 \times 10^{-8}$   | $3.83 \times 10^{-20}$                   | $1.31 \times 10^{12}$       | 2.26869       | $3.04 \times 10^{-9}$                                   |
| rs2517985 | rs7754026  | 5       | $5.02 \times 10^{-8}$   | $6.74 \times 10^{-8}$   | $4.41 \times 10^{-20}$                   | $1.14 \times 10^{12}$       | 2.2664        | $3.04 \times 10^{-9}$                                   |
| rs2517985 | rs13194571 | 5       | $5.02 \times 10^{-8}$   | $4.98 \times 10^{-8}$   | $4.95 \times 10^{-20}$                   | $1.00 \times 10^{12}$       | 2.2637        | $3.04 \times 10^{-9}$                                   |
| rs2517985 | rs7775117  | 5       | $5.02 \times 10^{-8}$   | $6.27 \times 10^{-8}$   | $5.03 \times 10^{-20}$                   | $9.99 \times 10^{11}$       | 2.2632        | $3.04 \times 10^{-9}$                                   |
| rs1265079 | rs4358666  | 5       | $7.09 \times 10^{-8}$   | $2.62 \times 10^{-9}$   | $3.16 \times 10^{-21}$                   | $8.30 \times 10^{11}$       | 2.3042        | $4.77 \times 10^{-11}$                                  |
| rs1265079 | rs34100370 | 5       | $7.09 \times 10^{-8}$   | $2.62 \times 10^{-9}$   | $3.16 \times 10^{-21}$                   | $8.30 \times 10^{11}$       | 2.3042        | $3.33 \times 10^{-11}$                                  |
| rs1265079 | rs4624908  | 5       | $7.09 \times 10^{-8}$   | $7.03 \times 10^{-8}$   | $1.11 \times 10^{-19}$                   | $6.33 \times 10^{11}$       | 2.2501        | $2.17 \times 10^{-9}$                                   |
| rs746647  | rs4358666  | 5       | $9.60 \times 10^{-8}$   | $2.62 \times 10^{-9}$   | $4.62 \times 10^{-21}$                   | $5.67 \times 10^{11}$       | 2.2955        | $4.77 \times 10^{-11}$                                  |
| rs746647  | rs34100370 | 5       | $9.60 \times 10^{-8}$   | $2.62 \times 10^{-9}$   | $4.62 \times 10^{-21}$                   | $5.67 \times 10^{11}$       | 2.2955        | $3.33 \times 10^{-11}$                                  |
| rs1576    | rs4358666  | 5       | $9.60 \times 10^{-8}$   | $2.62 \times 10^{-9}$   | $4.62 \times 10^{-21}$                   | $5.67 \times 10^{11}$       | 2.2955        | $7.19 \times 10^{-11}$                                  |
| rs1576    | rs34100370 | 5       | $9.60 \times 10^{-8}$   | $2.62 \times 10^{-9}$   | $4.62 \times 10^{-21}$                   | $5.67 \times 10^{11}$       | 2.2955        | $4.93 \times 10^{-11}$                                  |
| rs1265114 | rs4358666  | 5       | $9.60 \times 10^{-8}$   | $2.62 \times 10^{-9}$   | $4.62 \times 10^{-21}$                   | $5.67 \times 10^{11}$       | 2.2955        | $6.84 \times 10^{-11}$                                  |
| rs1265114 | rs34100370 | 5       | $9.60 \times 10^{-8}$   | $2.62 \times 10^{-9}$   | $4.62 \times 10^{-21}$                   | $5.67 \times 10^{11}$       | 2.2955        | $4.55 \times 10^{-11}$                                  |
| rs1265079 | rs7754026  | 5       | $7.09 \times 10^{-8}$   | $6.74 \times 10^{-8}$   | $1.28 \times 10^{-19}$                   | $5.27 \times 10^{11}$       | 2.2477        | $2.17 \times 10^{-9}$                                   |
| rs1265112 | rs4358666  | 5       | $8.43 \times 10^{-8}$   | $2.62 \times 10^{-9}$   | $5.14 \times 10^{-21}$                   | $5.10 \times 10^{11}$       | 2.2934        | $6.84 \times 10^{-11}$                                  |
| rs1265112 | rs34100370 | 5       | $8.43 \times 10^{-8}$   | $2.62 \times 10^{-9}$   | $5.14 \times 10^{-21}$                   | $5.10 \times 10^{11}$       | 2.2934        | $4.55 \times 10^{-11}$                                  |
| rs1265067 | rs4358666  | 5       | $1.05 \times 10^{-7}$   | $2.62 \times 10^{-9}$   | $5.14 \times 10^{-21}$                   | $5.10 \times 10^{11}$       | 2.2934        | $6.84 \times 10^{-11}$                                  |

**Supplementary Table S6:** This table shows the top 20 statistically significant 2<sup>nd</sup> order SNP-SNP interactions in terms of improvement metric value from psoriasis dataset phs000982.v1.p1.

| SNP        | Chr | Position  | Annotation            | Consequence      | GeneName           | GeneType          |
|------------|-----|-----------|-----------------------|------------------|--------------------|-------------------|
| rs10483336 | 14  | 28837590  | Transcript            | INTRONIC         | CTD-2591A6.2       | lincRNA           |
| rs10484554 | 6   | 31274555  | Intergenic            | DOWNSTREAM       | XXbac-BPG248L24.10 | pseudogene        |
| rs10848821 | 12  | 3298031   | Transcript            | INTRONIC         | TSPAN9             | protein coding    |
| rs12191877 | 6   | 31252925  | Intergenic            | DOWNSTREAM       | RPL3P2             | pseudogene        |
| rs1265067  | 6   | 31116142  | Transcript            | INTRONIC         | CCHCR1             | protein coding    |
| rs1265078  | 6   | 31112602  | Intergenic            | DOWNSTREAM       | PSORS1C1           | protein coding    |
| rs1265079  | 6   | 31112108  | Intergenic            | UPSTREAM         | PSORS1C2           | protein coding    |
| rs1265112  | 6   | 31118019  | Transcript            | INTRONIC         | CCHCR1             | protein coding    |
| rs1265114  | 6   | 31117188  | Transcript            | INTRONIC         | CCHCR1             | protein coding    |
| rs13191519 | 6   | 31265752  | Transcript            | INTRONIC         | XXbac-BPG248L24.13 | lincRNA           |
| rs13194571 | 6   | 31342960  | Intergenic            | DOWNSTREAM       | RNU6-283P          | snRNA             |
| rs13203895 | 6   | 31244082  | Non-Coding Transcript | NONCODING_CHANGE | USP8P1             | pseudogene        |
| rs1576     | 6   | 31110391  | Regulatory Feature    | NON_SYNONYMOUS   | CCHCR1             | protein coding    |
| rs17728338 | 5   | 150478318 | Intergenic            | DOWNSTREAM       | ANXA6              | protein coding    |
| rs2244027  | 6   | 31347566  | Intergenic            | UPSTREAM         | ZDHHC20P2          | pseudogene        |
| rs2395491  | 6   | 31342420  | Intergenic            | DOWNSTREAM       | RNU6-283P          | snRNA             |
| rs2516417  | 6   | 31459636  | Regulatory Feature    | REGULATORY       | -                  | -                 |
| rs2516510  | 6   | 31449914  | Intergenic            | DOWNSTREAM       | HCP5               | sense overlapping |
| rs2517985  | 6   | 31118942  | Transcript            | INTRONIC         | CCHCR1             | protein coding    |
| rs2523708  | 6   | 31451279  | Intergenic            | INTERGENIC       | -                  | -                 |
| rs2534666  | 6   | 31468546  | Intergenic            | UPSTREAM         | Y_RNA              | misc RNA          |
| rs2844502  | 6   | 31445216  | Non-Coding Transcript | NONCODING_CHANGE | HCP5               | sense overlapping |
| rs2844645  | 6   | 31015182  | Intergenic            | INTERGENIC       | -                  | -                 |
| rs2853950  | 6   | 31236175  | Intergenic            | DOWNSTREAM       | HLA-C              | protein coding    |
| rs2894176  | 6   | 30986038  | Transcript            | INTRONIC         | MUC22              | protein coding    |
| rs2894207  | 6   | 31263751  | Transcript            | INTRONIC         | XXbac-BPG248L24.13 | lincRNA           |
| rs3094205  | 6   | 31091862  | Intergenic            | UPSTREAM         | CDSN               | protein coding    |
| rs3130467  | 6   | 31187075  | Intergenic            | UPSTREAM         | XXbac-BPG299F13.15 | pseudogene        |
| rs3130517  | 6   | 31190303  | Intergenic            | UPSTREAM         | XXbac-BPG299F13.15 | pseudogene        |
| rs3130573  | 6   | 31106268  | Intergenic            | DOWNSTREAM       | CCHCR1             | protein coding    |
| rs34100370 | 6   | 31339937  | Intergenic            | DOWNSTREAM       | RNU6-283P          | snRNA             |
| rs4349859  | 6   | 31365787  | Regulatory Feature    | REGULATORY       | -                  | -                 |
| rs4358666  | 6   | 31340477  | Intergenic            | DOWNSTREAM       | RNU6-283P          | snRNA             |
| rs4418214  | 6   | 31391401  | Transcript            | INTRONIC         | HCP5               | sense overlapping |
| rs45533135 | 6   | 31430951  | Non-Coding Transcript | NONCODING_CHANGE | HCP5               | sense overlapping |
| rs4624908  | 6   | 31342827  | Intergenic            | DOWNSTREAM       | RNU6-283P          | snRNA             |
| rs6075938  | 20  | 22689686  | Intergenic            | INTERGENIC       | -                  | -                 |
| rs746647   | 6   | 31114182  | Transcript            | INTRONIC         | CCHCR1             | protein coding    |
| rs7754026  | 6   | 31345064  | Intergenic            | UPSTREAM         | ZDHHC20P2          | pseudogene        |
| rs7756521  | 6   | 30848253  | Intergenic            | UPSTREAM         | DDR1               | protein coding    |
| rs7773175  | 6   | 31240959  | Intergenic            | UPSTREAM         | HLA-C              | protein coding    |
| rs7775117  | 6   | 31345486  | Coding Transcript     | NONCODING_CHANGE | FGFR3P1            | pseudogene        |
| rs8365     | 6   | 32148403  | Intergenic            | DOWNSTREAM       | PBX2               | protein coding    |
| rs9262492  | 6   | 30986015  | Transcript            | INTRONIC         | MUC22              | protein coding    |
| rs9262498  | 6   | 30986835  | Transcript            | INTRONIC         | MUC22              | protein coding    |
| rs9380237  | 6   | 31264392  | Transcript            | INTRONIC         | XXbac-BPG248L24.13 | lincRNA           |

**Supplementary Table S7:** This table shows the genomic position and the nearest gene of every SNP in the top 20 SNP-SNP interactions in terms of *p*-value or improvement metric value from both datasets.



| Gene1              | Gene2              | phs000019.v1.p1        |                        |                          |            | phs000982.v1.p1         |                        |                          |            |
|--------------------|--------------------|------------------------|------------------------|--------------------------|------------|-------------------------|------------------------|--------------------------|------------|
|                    |                    | SNP1,SNP2,Pattern      | Pairwise Pval          | Improvement Metric Value | Odds Ratio | SNP1,SNP2,Pattern       | Pairwise Pval          | Improvement Metric Value | Odds Ratio |
| HLA-C              | PSORS1C1           | rs1265078,rs7773175,4  | $4.69 \times 10^{-25}$ | $6.48 \times 10^{11}$    | 3.0436     | rs6911408,rs2853953,4   | $3.51 \times 10^{-28}$ | $1.30 \times 10^9$       | 2.5349     |
| PSORS1C1           | XXbac-BPG248L24.13 | rs1265078,rs2894207,4  | $1.43 \times 10^{-26}$ | $8.94 \times 10^{10}$    | 3.3389     | rs6911408,rs9468932,4   | $2.00 \times 10^{-28}$ | $4.77 \times 10^{10}$    | 2.5974     |
| CCHCR1             | HLA-C              | rs3130573,rs7773175,4  | $5.68 \times 10^{-24}$ | $5.35 \times 10^{10}$    | 3.0176     | rs3130453,rs2249742,2   | $7.09 \times 10^{-18}$ | $1.11 \times 10^9$       | 1.9954     |
| XXbac-BPG248L24.13 | Y_RNA              | rs9380237,rs2534666,4  | $1.11 \times 10^{-20}$ | $5.02 \times 10^{10}$    | 2.7506     | rs9380237,rs2596542,4   | $6.23 \times 10^{-20}$ | $6.53 \times 10^6$       | 2.1035     |
| XXbac-BPG248L24.13 | XXbac-BPG299F13.15 | rs3130467,rs2894207,4  | $7.28 \times 10^{-27}$ | $3.86 \times 10^{10}$    | 3.3781     | rs1639110,rs9380238,4   | $6.25 \times 10^{-19}$ | $3.34 \times 10^7$       | 2.2810     |
| HLA-C              | XXbac-BPG299F13.15 | rs3130517,rs7773175,4  | $1.45 \times 10^{-26}$ | $2.46 \times 10^9$       | 3.1788     | rs6933647,rs2524096,5   | $5.16 \times 10^{-18}$ | $5.07 \times 10^6$       | 2.5830     |
| MUC22              | PSORS1C1           | rs9262498,rs1265078,4  | $3.71 \times 10^{-20}$ | $6.46 \times 10^8$       | 2.6695     | rs7776233,rs9263717,4   | $1.99 \times 10^{-22}$ | $6.19 \times 10^6$       | 2.2224     |
| CCHCR1             | XXbac-BPG248L24.13 | rs3130573,rs2894207,4  | $2.26 \times 10^{-24}$ | $5.66 \times 10^8$       | 3.1827     | rs130076,rs9380238,4    | $4.02 \times 10^{-18}$ | $1.40 \times 10^7$       | 2.2358     |
| PSORS1C1           | RNU6-283P          | rs2844580,rs1265078,2  | $6.06 \times 10^{-14}$ | 394.984                  | 2.1622     | rs1265078,rs4624908,5   | $1.43 \times 10^{-19}$ | $4.90 \times 10^{11}$    | 2.2451     |
| CDSN               | XXbac-BPG248L24.13 | rs3094205,rs9380237,4  | $2.96 \times 10^{-18}$ | $1.89 \times 10^8$       | 2.5056     | rs3130982,rs9366778,5   | $5.54 \times 10^{-16}$ | $3.63 \times 10^6$       | 3.1811     |
| MICA               | RNU6-283P          | rs9266490,rs6933779,4  | $6.74 \times 10^{-15}$ | $8.79 \times 10^7$       | 2.9467     | rs4358666,rs9468992,5   | $4.52 \times 10^{-19}$ | $4.74 \times 10^6$       | 2.0073     |
| CCHCR1             | CDSN               | rs3094205,rs3130573,4  | $2.89 \times 10^{-17}$ | $7.90 \times 10^7$       | 2.4316     | rs6913137,rs130069,5    | $3.62 \times 10^{-22}$ | $1.82 \times 10^6$       | 2.2245     |
| CCHCR1             | MUC22              | rs9262498,rs3130573,4  | $9.46 \times 10^{-16}$ | $7.15 \times 10^7$       | 2.3177     | rs13210132,rs130069,5   | $1.27 \times 10^{-19}$ | $2.27 \times 10^6$       | 2.2636     |
| MUC22              | XXbac-BPG248L24.13 | rs9262498,rs2894207,4  | $2.86 \times 10^{-23}$ | $4.47 \times 10^7$       | 3.0012     | rs7776233,rs1960278,4   | $4.34 \times 10^{-15}$ | $6.28 \times 10^8$       | 1.8616     |
| HLA-C              | XXbac-BPG248L24.13 | rs3132486,rs9380237,2  | $1.89 \times 10^{-17}$ | $2.96 \times 10^7$       | 2.4126     | rs2853952,rs9468932,4   | $6.31 \times 10^{-28}$ | $6.98 \times 10^8$       | 2.5409     |
| CDSN               | MUC22              | rs9394031,rs3094205,4  | $1.01 \times 10^{-16}$ | $5.85 \times 10^6$       | 2.9664     | rs7776233,rs2233959,4   | $1.54 \times 10^{-15}$ | $1.33 \times 10^6$       | 1.8673     |
| HCG27              | HCP5               | rs7762933,rs9501106,2  | $4.19 \times 10^{-15}$ | $4.85 \times 10^6$       | 2.5424     | rs3132506,rs45533135,5  | $5.56 \times 10^{-20}$ | $5.90 \times 10^7$       | 2.0667     |
| HCP5               | XXbac-BPG248L24.13 | rs2894207,rs2844502,3  | $1.16 \times 10^{-21}$ | $1.10 \times 10^6$       | 2.7467     | rs1960278,rs4947314,4   | $2.87 \times 10^{-18}$ | $2.09 \times 10^9$       | 2.1659     |
| CDSN               | HLA-C              | rs3094205,rs7773175,4  | $1.23 \times 10^{-19}$ | $2.48 \times 10^6$       | 2.6222     | rs3094222,rs2524096,5   | $2.83 \times 10^{-18}$ | $9.25 \times 10^6$       | 2.5940     |
| HCP5               | RNU6-283P          | rs9266490,rs9501106,4  | $1.12 \times 10^{-14}$ | $1.81 \times 10^6$       | 2.9946     | rs4358666,rs10223568,5  | $2.52 \times 10^{-19}$ | $4.53 \times 10^6$       | 2.0154     |
| HCP5               | MUC22              | rs9394031,rs9501106,4  | $4.48 \times 10^{-16}$ | $1.31 \times 10^6$       | 3.4966     | rs13210132,rs45533135,5 | $5.05 \times 10^{-20}$ | $5.71 \times 10^6$       | 2.2482     |
| HLA-B              | PSORS1C1           | rs1265078,rs2156875,3  | $2.17 \times 10^{-16}$ | 110.613                  | 2.3419     | rs6911408,rs2523619,4   | $2.29 \times 10^{-25}$ | $7.73 \times 10^9$       | 2.3932     |
| RNU6-283P          | XXbac-BPG299F13.15 | rs2844580,rs3130467,2  | $7.02 \times 10^{-20}$ | 4000.37                  | 2.5763     | rs1639110,rs4358666,5   | $1.31 \times 10^{-21}$ | $1.60 \times 10^{10}$    | 2.2792     |
| HCG20              | PSORS1C1           | rs12526186,rs1265078,4 | $2.64 \times 10^{-16}$ | 90.558.8                 | 2.7948     | rs28894086,rs1265078,4  | $2.99 \times 10^{-17}$ | $4.10 \times 10^9$       | 2.0505     |
| PSORS1C1           | RPL3P2             | rs1265078,rs12191877,4 | $6.80 \times 10^{-28}$ | 101.408                  | 3.5547     | rs6931633,rs2853935,4   | $7.53 \times 10^{-25}$ | $2.18 \times 10^9$       | 2.3316     |
| HCP5               | HLA-C              | rs7773175,rs2516510,3  | $1.06 \times 10^{-16}$ | 2864.29                  | 2.3592     | rs2853952,rs45533135,5  | $7.64 \times 10^{-29}$ | $5.76 \times 10^9$       | 2.4587     |
| CDSN               | HCG22              | rs2523857,rs3094205,2  | $1.23 \times 10^{-14}$ | 185.829                  | 2.2090     | rs16898629,rs6913137,5  | $2.40 \times 10^{-22}$ | $2.74 \times 10^6$       | 2.2284     |
| CDSN               | HCP5               | rs3094205,rs9295991,4  | $1.31 \times 10^{-14}$ | 174.387                  | 2.3617     | rs6913137,rs45533135,5  | $1.60 \times 10^{-22}$ | $4.11 \times 10^6$       | 2.2155     |
| HCP5               | RPL3P2             | rs12191877,rs2844502,3 | $1.35 \times 10^{-27}$ | 51.197.2                 | 3.3261     | rs2524052,rs4947314,4   | $4.16 \times 10^{-18}$ | $1.44 \times 10^9$       | 2.1490     |
| USP8P1             | XXbac-BPG248L24.13 | rs3132485,rs9380237,2  | $3.64 \times 10^{-15}$ | 153.429                  | 2.2475     | rs2844603,rs9468932,4   | $7.15 \times 10^{-24}$ | $1.34 \times 10^6$       | 2.3445     |
| HLA-C              | LINC01149          | rs7773175,rs2516460,4  | $8.99 \times 10^{-18}$ | 33.819.1                 | 2.4525     | rs2524096,rs28575156,4  | $1.51 \times 10^{-20}$ | $4.55 \times 10^7$       | 2.3562     |
| HLA-C              | USP8P1             | rs3132485,rs7773175,2  | $7.92 \times 10^{-18}$ | 38.353.5                 | 2.4264     | rs9264602,rs9468914,5   | $5.92 \times 10^{-15}$ | $1.81 \times 10^6$       | 2.3210     |
| PSORS1C1           | WASF5P             | rs1265078,rs9468926,3  | $1.36 \times 10^{-14}$ | 1759.12                  | 2.2168     | rs6931633,rs2524163,4   | $1.18 \times 10^{-24}$ | $1.39 \times 10^9$       | 2.3224     |
| RNU6-283P          | XXbac-BPG154L12.4  | rs9266490,rs6916062,4  | $4.25 \times 10^{-16}$ | 27.453.4                 | 4.3360     | rs4358666,rs6916062,5   | $2.92 \times 10^{-15}$ | 898.239                  | 1.8483     |
| PSORS1C3           | XXbac-BPG248L24.13 | rs887464,rs9380237,2   | $2.97 \times 10^{-14}$ | 18.803.2                 | 2.1875     | rs887468,rs9468932,4    | $7.80 \times 10^{-28}$ | $1.29 \times 10^7$       | 2.5444     |
| RPL3P2             | ZDHHC20P2          | rs2244027,rs12191877,2 | $4.28 \times 10^{-27}$ | 16.113.6                 | 3.2691     | rs12191877,rs13202464,5 | $3.90 \times 10^{-30}$ | $3.10 \times 10^6$       | 2.4911     |
| HLA-C              | ZDHHC20P2          | rs2244027,rs7773175,2  | $3.35 \times 10^{-15}$ | 129.232                  | 2.2599     | rs2853952,rs13202464,5  | $1.52 \times 10^{-28}$ | $2.91 \times 10^9$       | 2.4497     |
| CCHCR1             | PSORS1C1           | rs1265078,rs3130453,3  | $3.30 \times 10^{-15}$ | 7258.28                  | 2.2521     | rs6929464,rs1265112,4   | $5.22 \times 10^{-16}$ | $8.38 \times 10^7$       | 2.0687     |
| HLA-B              | HLA-C              | rs7773175,rs2156875,3  | $7.53 \times 10^{-17}$ | 4038.26                  | 2.3627     | rs2844624,rs2523619,4   | $3.00 \times 10^{-21}$ | $2.16 \times 10^7$       | 2.1636     |
| POU5F1             | XXbac-BPG248L24.13 | rs3094188,rs2894207,2  | $8.07 \times 10^{-19}$ | 1585.26                  | 2.5253     | rs6929434,rs9380238,5   | $1.55 \times 10^{-17}$ | $1.55 \times 10^7$       | 1.9712     |
| HCP5               | XXbac-BPG299F13.15 | rs3130467,rs9501106,4  | $4.43 \times 10^{-19}$ | 634.442                  | 3.3513     | rs1639110,rs45533135,5  | $1.28 \times 10^{-19}$ | $1.64 \times 10^8$       | 2.0320     |
| XXbac-BPG248L24.13 | ZDHHC20P2          | rs2244027,rs2894207,2  | $2.64 \times 10^{-18}$ | 484.266                  | 2.4920     | rs9380237,rs6927154,4   | $7.49 \times 10^{-24}$ | $2.42 \times 10^8$       | 2.3400     |
| HLA-C              | TCF19              | rs2073717,rs7773175,2  | $3.25 \times 10^{-16}$ | 936.341                  | 2.3163     | rs7750641,rs2524096,5   | $3.95 \times 10^{-18}$ | $6.62 \times 10^6$       | 2.5844     |
| HCG20              | HLA-C              | rs3131039,rs7773175,2  | $9.48 \times 10^{-15}$ | 32.0711                  | 2.2230     | rs12527188,rs2853961,4  | $5.51 \times 10^{-19}$ | $7.34 \times 10^8$       | 2.3412     |
| XXbac-BPG299F13.15 | ZDHHC20P2          | rs2244027,rs3130517,2  | $5.40 \times 10^{-19}$ | 66.149                   | 2.5096     | rs1639110,rs7754026,5   | $3.78 \times 10^{-20}$ | $5.53 \times 10^8$       | 2.2293     |
| LINC01149          | PSORS1C1           | rs1265078,rs2516460,4  | $7.68 \times 10^{-14}$ | 311.706                  | 2.1767     | rs6931633,rs28575156,4  | $4.52 \times 10^{-23}$ | $3.63 \times 10^7$       | 2.6075     |
| DHFRP2             | XXbac-BPG248L24.13 | rs2894207,rs9266329,3  | $5.93 \times 10^{-18}$ | 215.656                  | 2.4661     | rs9366778,rs4959062,6   | $1.21 \times 10^{-16}$ | $1.66 \times 10^7$       | 4.1400     |
| HLA-C              | MICB               | rs3131636,rs7773175,4  | $1.46 \times 10^{-15}$ | 208.315                  | 2.6027     | rs2524096,rs3130612,5   | $1.79 \times 10^{-17}$ | $1.46 \times 10^6$       | 2.4908     |
| HLA-C              | RNU6-283P          | rs2844580,rs7773175,2  | $5.32 \times 10^{-15}$ | 57.1072                  | 2.2327     | rs2853952,rs2523535,3   | $4.78 \times 10^{-27}$ | $9.20 \times 10^7$       | 2.3439     |
| C2                 | CCHCR1             | rs3130573,rs9267673,4  | $1.79 \times 10^{-20}$ | 119.671                  | 3.3632     | rs130069,rs9267673,5    | $3.31 \times 10^{-17}$ | 688.988                  | 2.0498     |
| MICA               | XXbac-BPG299F13.15 | rs3130467,rs9266844,4  | $2.69 \times 10^{-18}$ | 104.609                  | 2.8307     | rs1639110,rs17206680,5  | $8.36 \times 10^{-18}$ | $2.50 \times 10^6$       | 1.9661     |
| HLA-C              | PSORS1C3           | rs4713438,rs7773175,2  | $9.56 \times 10^{-15}$ | 31.7954                  | 2.2270     | rs3130506,rs2249742,2   | $2.35 \times 10^{-16}$ | $3.35 \times 10^7$       | 1.9880     |
| C2                 | ZDHHC20P2          | rs2442749,rs9267673,2  | $4.05 \times 10^{-20}$ | 52.8453                  | 3.0754     | rs13202464,rs9267677,5  | $4.84 \times 10^{-18}$ | $4.99 \times 10^6$       | 2.0148     |
| PSORS1C1           | XXbac-BPG299F13.15 | rs1265078,rs3130467,4  | $1.02 \times 10^{-17}$ | 27.5987                  | 2.4224     | rs6929464,rs1639110,4   | $8.13 \times 10^{-19}$ | $2.57 \times 10^7$       | 2.2778     |
| LINC00243          | XXbac-BPG248L24.13 | rs1264344,rs2894207,2  | $3.54 \times 10^{-17}$ | 36.1766                  | 2.4510     | rs4248149,rs9380237,4   | $1.92 \times 10^{-20}$ | $1.39 \times 10^7$       | 2.4030     |
| PPIAP9             | RNU6-283P          | rs2253907,rs9267464,4  | $2.38 \times 10^{-17}$ | 50.5393                  | 3.6310     | rs4358666,rs9267464,5   | $1.22 \times 10^{-15}$ | $2.15 \times 10^6$       | 1.8643     |
| HCG22              | HLA-C              | rs2523857,rs7773175,2  | $8.42 \times 10^{-15}$ | 36.079                   | 2.2320     | rs3131788,rs2524096,5   | $2.66 \times 10^{-18}$ | $9.85 \times 10^6$       | 2.5957     |
| HCG20              | XXbac-BPG299F13.15 | rs3129980,rs3130517,2  | $1.01 \times 10^{-18}$ | 35.4352                  | 2.5010     | rs28894086,rs3130517,4  | $5.44 \times 10^{-18}$ | $5.53 \times 10^6$       | 2.1174     |
| LINC00243          | RPL3P2             | rs886423,rs12191877,2  | $2.61 \times 10^{-24}$ | 26.4495                  | 2.9820     | rs12660883,rs2524052,4  | $4.03 \times 10^{-16}$ | $1.22 \times 10^6$       | 2.1390     |
| HCP5               | PPIAP9             | rs9501106,rs9267464,4  | $5.23 \times 10^{-17}$ | 22.9963                  | 3.9233     | rs45533135,rs9267464,5  | $5.90 \times 10^{-15}$ | $2.04 \times 10^6$       | 1.9821     |

**Supplementary Table S8:** This table shows the common gene-gene interactions predicted from the SNP-SNP interactions with top 1000th improvement metric value from datasets phs000019.v1.p1 and phs000982.v1.p1

| Gene               | Chr | Start Pos  | End Pos    | Type                       |
|--------------------|-----|------------|------------|----------------------------|
| LINC00243          | 6   | 30,766,431 | 30,798,436 | Known processed transcript |
| MUC22              | 6   | 30,978,251 | 31,003,179 | Known protein coding       |
| HCG22              | 6   | 31,021,227 | 31,027,667 | Known lincRNA              |
| PSORS1C1           | 6   | 31,082,527 | 31,107,869 | Known protein coding       |
| CDSN               | 6   | 31,082,867 | 31,088,223 | Known protein coding       |
| CCHCR1             | 6   | 31,110,216 | 31,126,015 | Known protein coding       |
| TCF19              | 6   | 31,126,319 | 31,134,936 | Known protein coding       |
| POU5F1             | 6   | 31,132,119 | 31,148,508 | Known protein coding       |
| PSORS1C3           | 6   | 31,141,512 | 31,145,676 | Known sense intronic       |
| HCG27              | 6   | 31,165,537 | 31,171,745 | Known protein coding       |
| XXbac-BPG299F13.15 | 6   | 31,190,690 | 31,190,870 | Known pseudogene           |
| HLA-C              | 6   | 31,236,526 | 31,239,907 | Known protein coding       |
| USP8P1             | 6   | 31,243,349 | 31,246,531 | Known pseudogene           |
| RPL3P2             | 6   | 31,248,094 | 31,249,296 | Known pseudogene           |
| WASF5P             | 6   | 31,255,287 | 31,256,741 | Known pseudogene           |
| XXbac-BPG248L24.13 | 6   | 31,261,685 | 31,269,419 | Novel lincRNA              |
| HLA-B              | 6   | 31,321,649 | 31,324,965 | Known protein coding       |
| DHFRP2             | 6   | 31,334,129 | 31,334,675 | Known pseudogene           |
| RNU6-283P          | 6   | 31,337,911 | 31,338,017 | Known snRNA                |
| ZDHHC20P2          | 6   | 31,348,188 | 31,348,616 | Known pseudogene           |
| HCP5               | 6   | 31,368,479 | 31,445,283 | Known sense overlapping    |
| Y_RNA              | 6   | 31,369,929 | 31,370,027 | Novel misc RNA             |
| MICA               | 6   | 31,371,356 | 31,383,092 | Known protein coding       |
| LINC01149          | 6   | 31,409,444 | 31,414,750 | Novel lincRNA              |
| MICB               | 6   | 31,462,658 | 31,478,901 | Known protein coding       |
| PPIAP9             | 6   | 31,487,257 | 31,488,068 | Known pseudogene           |
| C2                 | 6   | 31,865,562 | 31,913,449 | Known protein coding       |
| XXbac-BPG154L12.4  | 6   | 32,223,488 | 32,233,615 | Novel antisense            |
| HCG20              | 6   | 30,760,027 | 30,760,027 | Known lincRNA              |

**Supplementary Table S9:** This table shows the genes found among the 60 common gene-gene interactions predicted from the SNP-SNP interactions with top 10000 improvement metric value from datasets phs000019.v1.p1 and phs000982.v1.p1

| No. of SNP | Mode                  | Heritability |        |          |        |
|------------|-----------------------|--------------|--------|----------|--------|
|            |                       | 0.1          | 0.2    | 0.3      | 0.4    |
| 1000       | Without Look-up Table | 54.81s       | 54.93s | 54.82s   | 54.97s |
|            | With Look-up Table    | 6.155s       | 6.303s | 6.280s   | 6.292s |
|            | Speed-Up              | 8.906x       | 8.715x | 8.729x   | 8.737x |
| 5000       | Without Look-up Table | 1470s        | 1467s  | 1465s    | 1469s  |
|            | With Look-up Table    | 138.2s       | 138.3s | 138.366s | 138.5s |
|            | Speed-Up              | 10.63x       | 10.61x | 10.59x   | 10.60x |
| 10000      | Without Look-up Table | 5777s        | 5784s  | 5783s    | 5833s  |
|            | With Look-up Table    | 550s         | 551s   | 551s     | 551s   |
|            | Speed-Up              | 10.50x       | 10.50x | 10.50x   | 10.59x |

**Supplementary Table S10:** This table shows the runtime of the program with or without the pre-computed look-up table under different datasets.

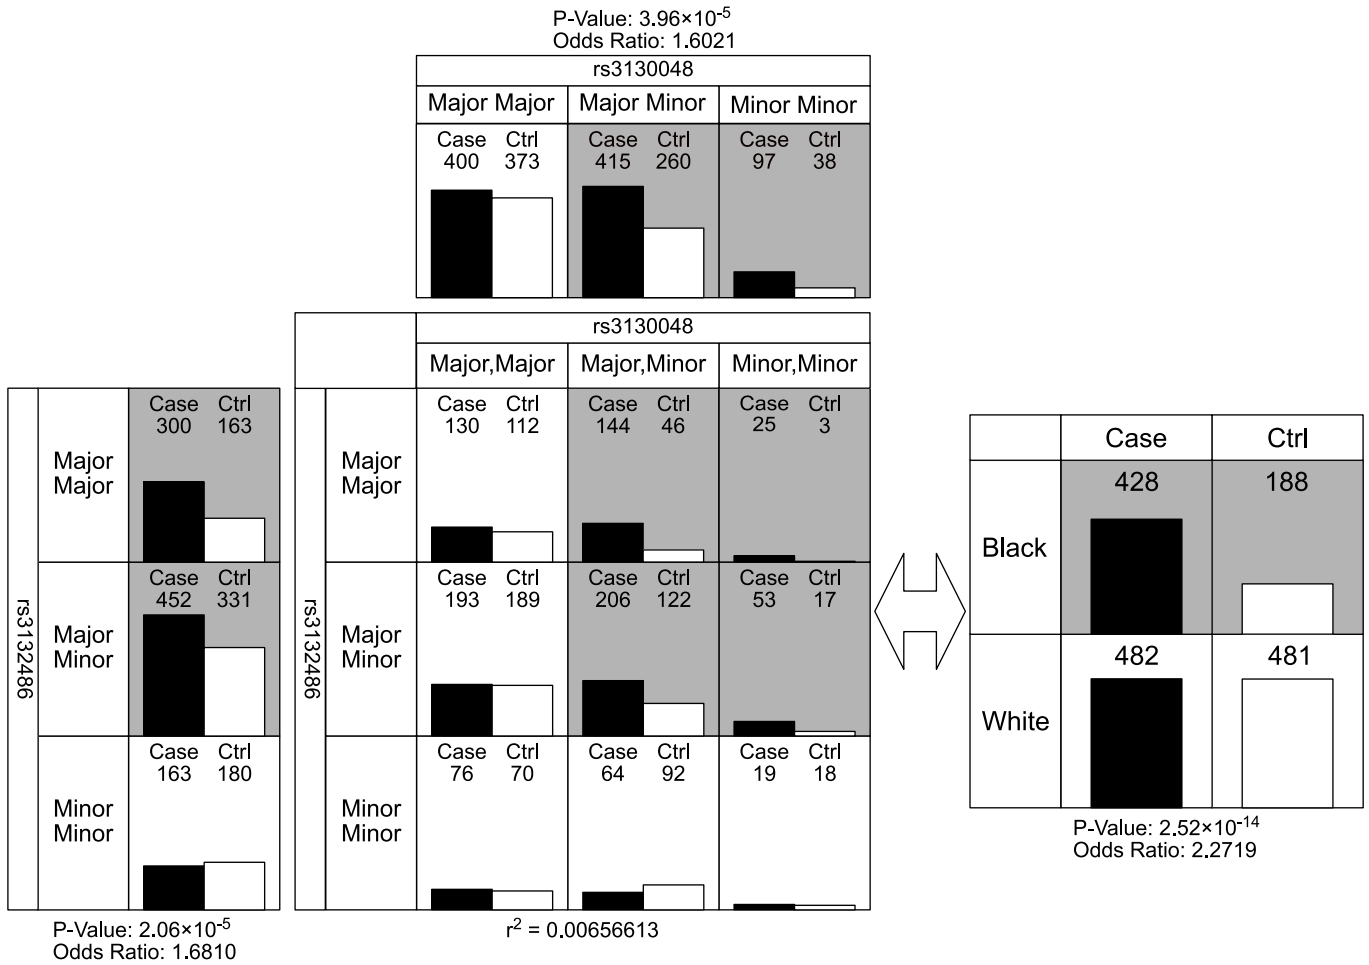

**Supplementary Figure S1:** This figure shows the interaction between SNPs rs3132486 and rs3130048 found from dataset phs000019.v1.p1 which is an example of an potential non-linear SNP-SNP interaction.

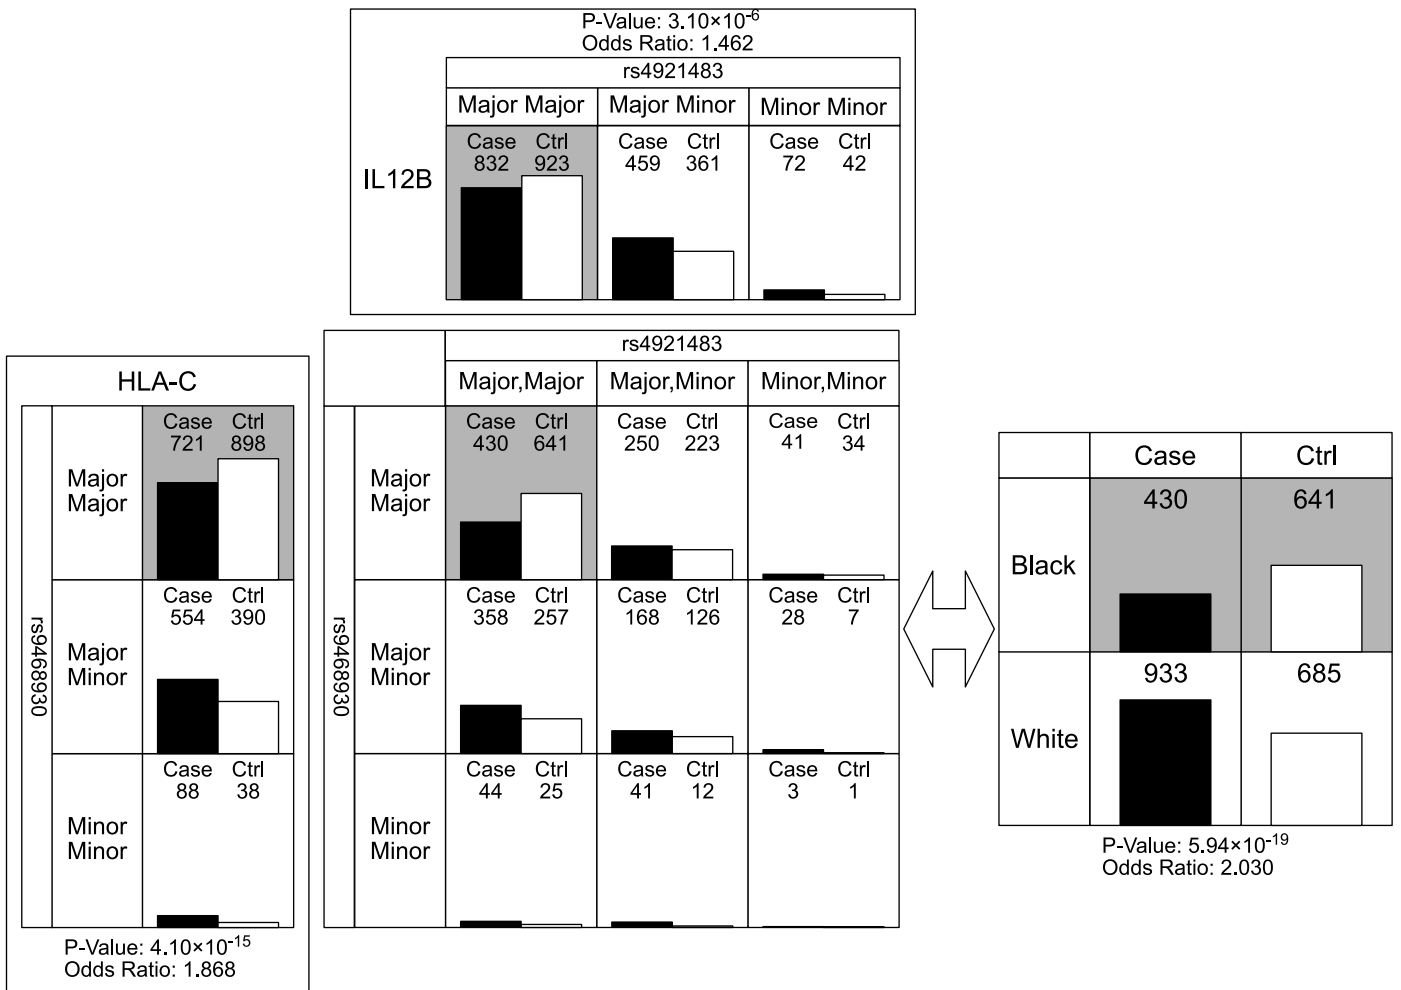

**Supplementary Figure S2:** This figure shows the interaction between two SNPs rs9468930 and rs4921483 imputed from dataset phs000982.v1.p1. which is an example of a SNP-SNP interaction between two psoriasis associated genes *HLA-C* and *IL12B*.

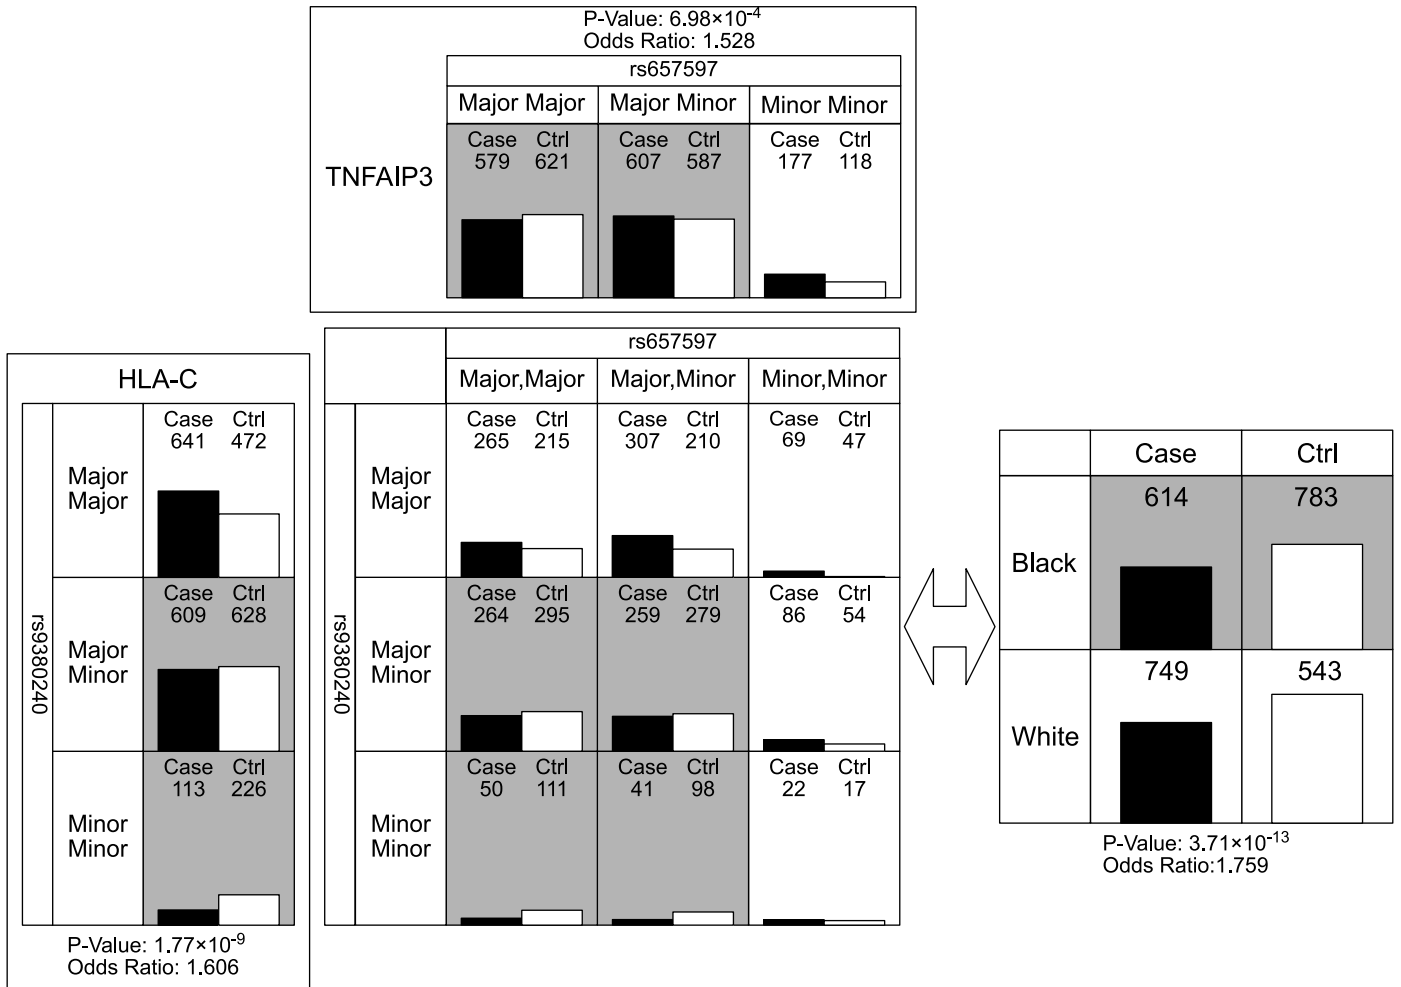

**Supplementary Figure S3:** This figure shows the interaction between two SNPs rs9380240 and rs657597 imputed from dataset phs000982.v1.p1 which is an example of a SNP-SNP interaction between two psoriasis associated genes *HLA-C* and *TNFAIP3*.

Venn diagram on gene pairs between phs000019 and phs000982

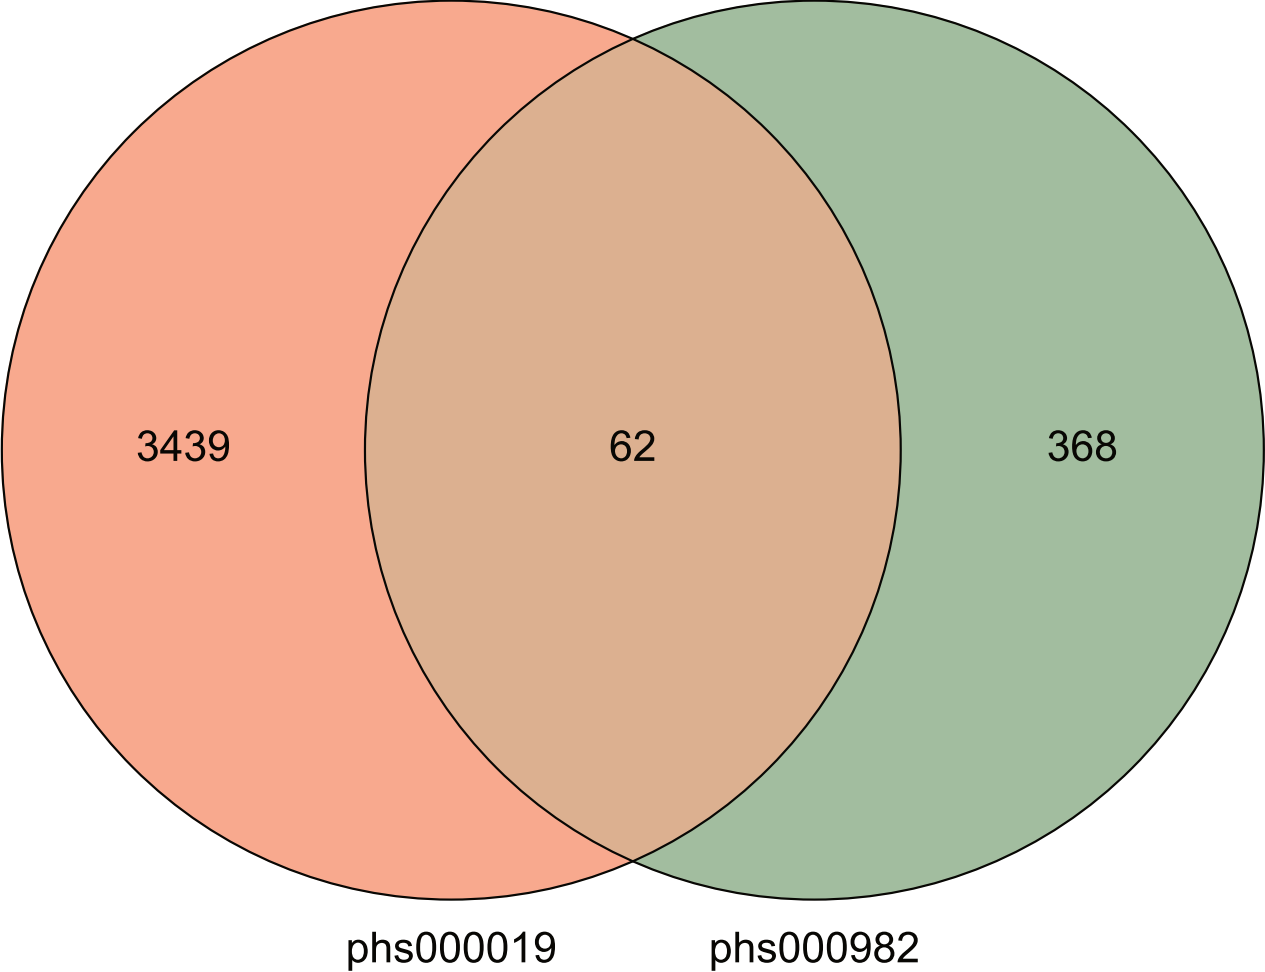

**Supplementary Figure S4:** This figure shows the number of gene-gene interactions predicted from the top 10000 SNP-SNP interactions in terms of improvement metric value found from datasets phs000019.v1.p1 and phs000982.v1.p1.

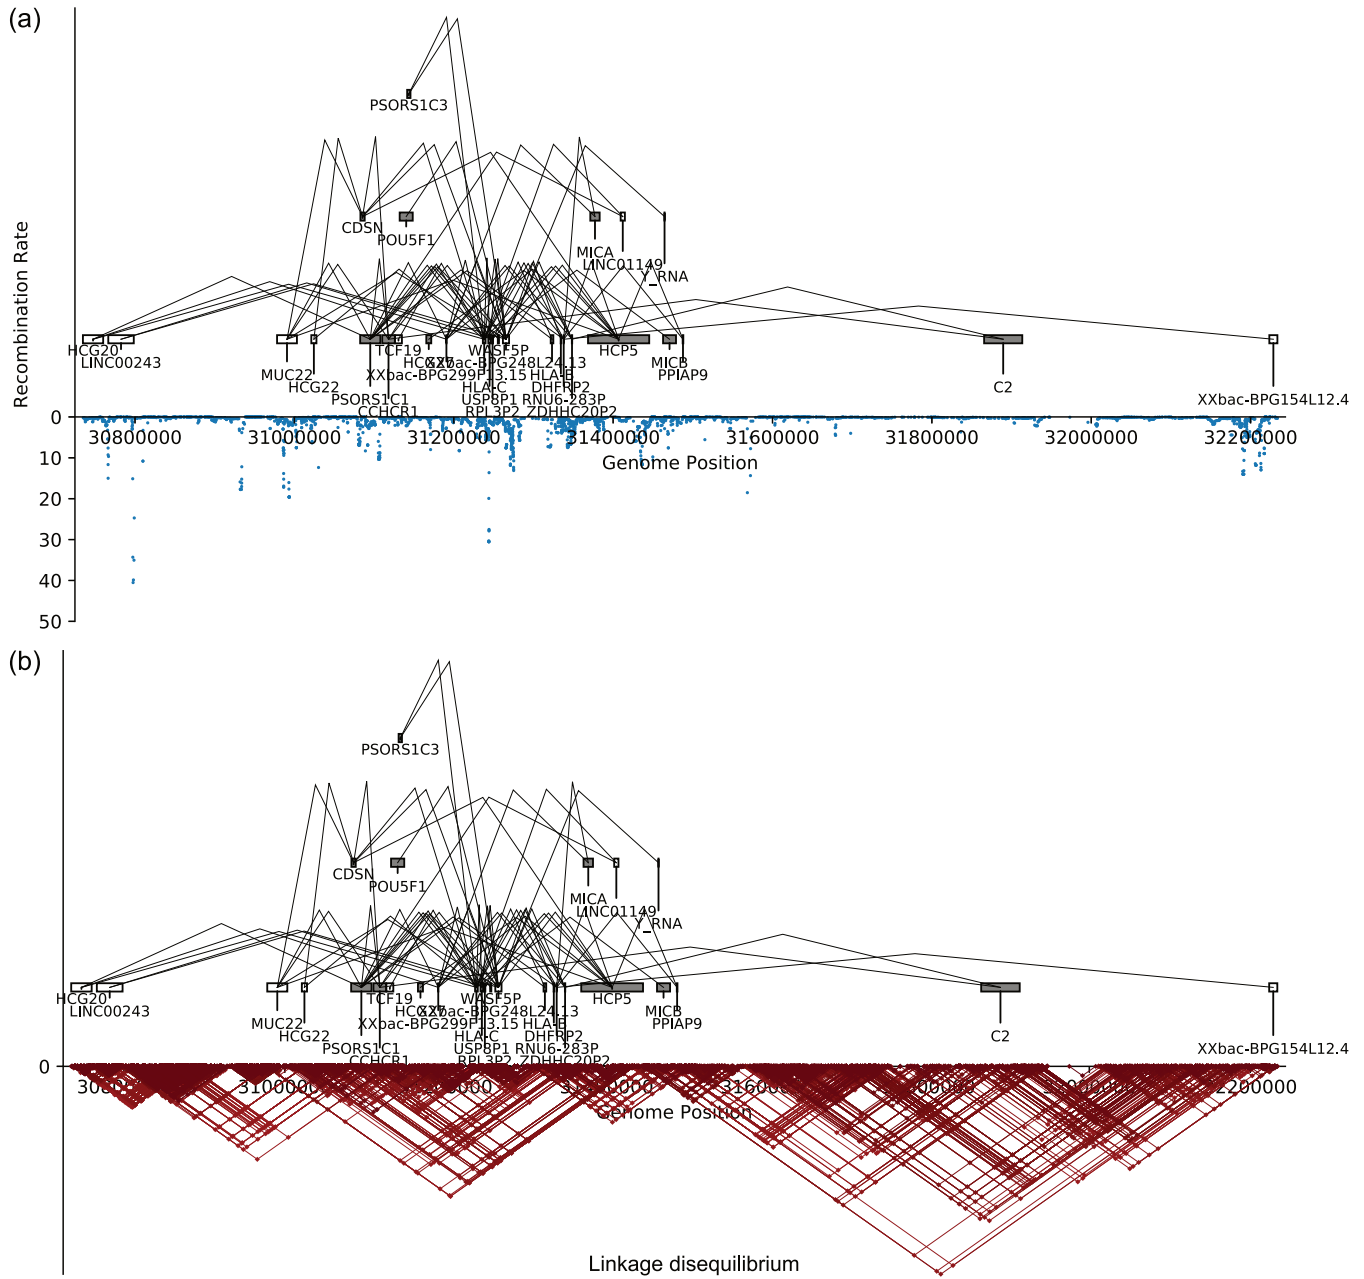

**Supplementary Figure S5:** In this figure, both parts (a) and (b) show the gene network constructed from 60 common gene-gene interactions predicted from the top 10000 SNP-SNP interactions in terms of improvement metric value found from datasets phs000019.v1.p1 and phs000982.v1.p1 with a linear layout, where the genes are laid down according to their genomic position in Chromosome 6. The genomic combination rate and the SNP pairs with a significant linkage disequilibrium score ( $r$  larger than 0.9) along Chromosome 6 from position 30734602 to 32233615 are plotted in parts (a) and (b) respectively.



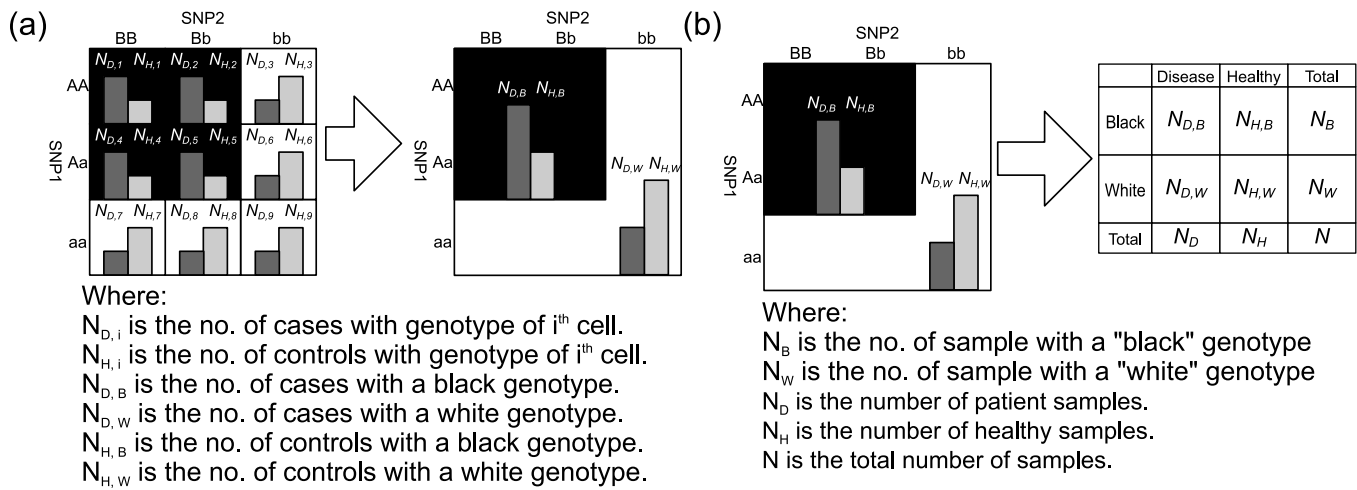

**Supplementary Figure S6:** In this figure, part (a) shows the process of aggregating the number of cases and controls with black and white genotypes in the 3x3 genotype table of  $SNP_1$  and  $SNP_2$ , where the genotypes are coloured according to the pattern 1 in Fig. 5b. Meanwhile, part (b) shows the process of arranging the total numbers of cases and controls calculated in part (a) into a 2x2 contingency table. Major alleles are represented by upper-case letters (i.e. A, B) and minor alleles are represented by lower-case letters (i.e. a, b).
